# Supplementary material for: Critical analysis of the utility of initial pleural aspiration in the diagnosis and management of suspected malignant pleural effusion
Source: PubMed Central journal article supplement — BMJ Open Respir Res. 2020 Sep 22;7(1):e000701. doi: 10.1136/bmjresp-2020-000701 (PMC7509958; doi:10.1136/bmjresp-2020-000701), 2020-09-22
Supplement: bmjresp-2020-000701supp001.pdf [file bmjresp-2020-000701supp001.pdf]

## Appendix

| <b>Diagnosis of Effusion from first pleural aspiration</b> | <b>Number of patients (% total)</b> |
|------------------------------------------------------------|-------------------------------------|
| Benign Asbestos Pleural Effusion                           | 17 (1.7%)                           |
| Post cardiac surgery                                       | 12 (1.2%)                           |
| Congestive Cardiac Failure                                 | 102 (10.2%)                         |
| Combined causes                                            | 22 (2.2%)                           |
| Complicated pleural infection                              | 112 (11.2%)                         |
| Critical Illness Related                                   | 63 (6.3%)                           |
| Connective Tissue Disease Related                          | 12 (1.2%)                           |
| Hepatic Hydrothorax                                        | 19 (1.9%)                           |
| Malignant Pleural Effusion                                 | 325 (32.6%)                         |
| Non-specific Pleuritis                                     | 50 (5.0%)                           |
| Other diagnoses (PE, trauma, chylothorax)                  | 38 (3.8%)                           |
| Parapneumonic Effusion                                     | 84 (8.4%)                           |
| Non cardiac fluid overload                                 | 7 (0.7%)                            |
| Tuberculosis                                               | 8 (0.8%)                            |
| Undiagnosed                                                | 127 (12.7%)                         |
